# Supplementary material for: Physicochemical, Spectroscopic, and Chromatographic Analyses in Combination with Chemometrics for the Discrimination of the Geographical Origin of Greek Graviera Cheeses
Source: MDPI journal article supplement (doi:10.3390/molecules25153507), 2020-07-31
Supplement: s1 [file s1]

## Supplementary

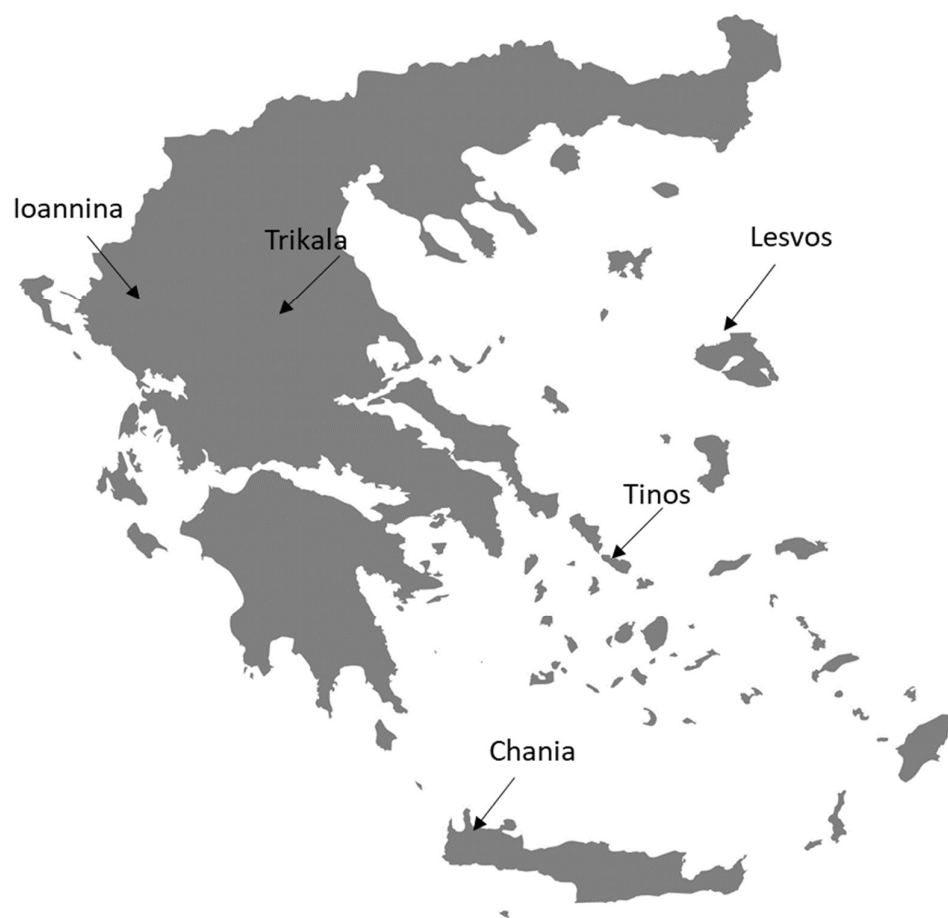

**Figure S1.** A map of Greece showing the regions of Graviera cheese samples collection.
